# Supplementary material for: Type 2 diabetes is associated with impaired jejunal enteroendocrine GLP-1 cell lineage in human obesity
Source: PubMed Central journal article supplement (PMC7752761; doi:10.1038/s41366-020-00694-1), 2020-10-09
Supplement: 41366_2020_694_MOESM1_ESM.pdf [file 41366_2020_694_MOESM1_ESM.pdf]

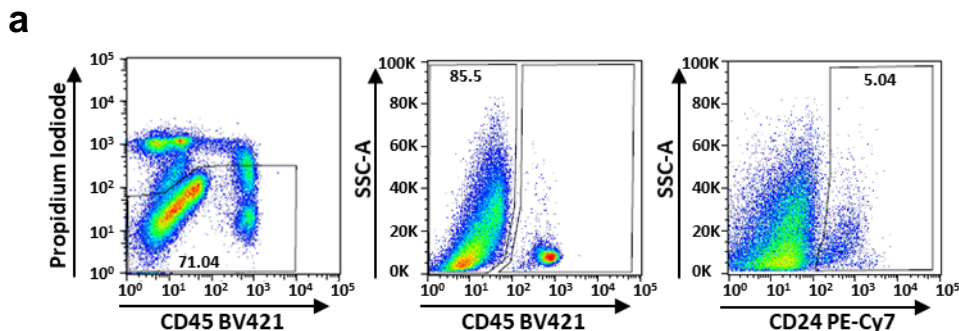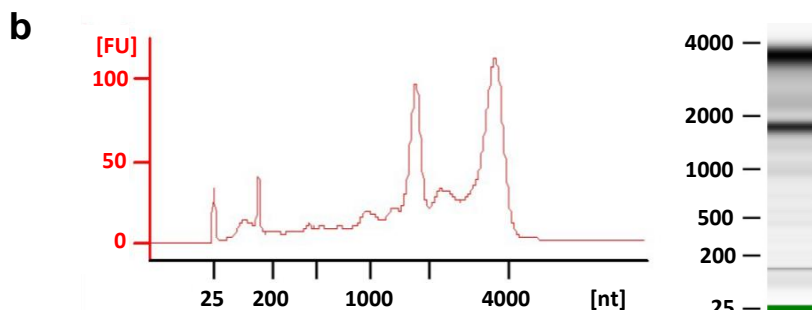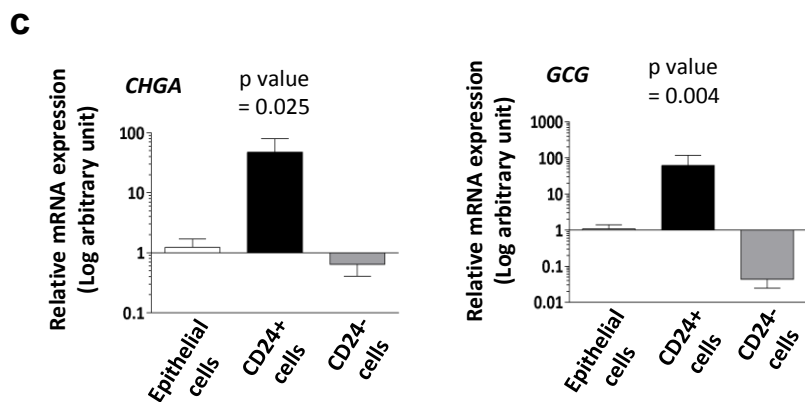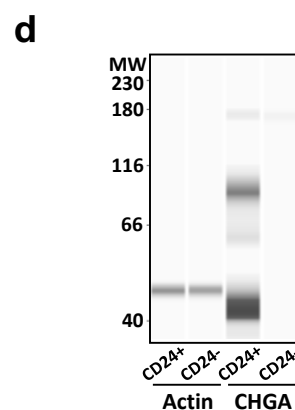

**Supplementary Fig. 1 a)** Gating strategy for EEC fraction isolation by FACS with CD45 and CD24 markers. **b)** Agilent Bioanalyzer 2100 trace of RNA quality from human EEC enriched populations. A representative RNA quality analysis of 8.2 value is presented (left panel). A representative electropherogram (left panel) and the respective representation as migration profile (right panel). **c)** Relative mRNA expression of ECC markers Chromogranin A (CHGA, left) and Proglucagon (GCG, right) in total epithelial cells (open bar), CD24+ sorted cells (black bar) and CD24- sorted cells (gray bar). The mRNA levels were normalized by 18S mRNA levels. Results are expressed as mean  $\pm$  SEM (n= 3 Ob individuals). **d)** Representative image by Simple Western assay of protein expression of CHGA (EEC marker) and Actin (control protein) in CD24+ and CD24- sorted cells (n= 4: 2 Ob and 2 ObD individuals).

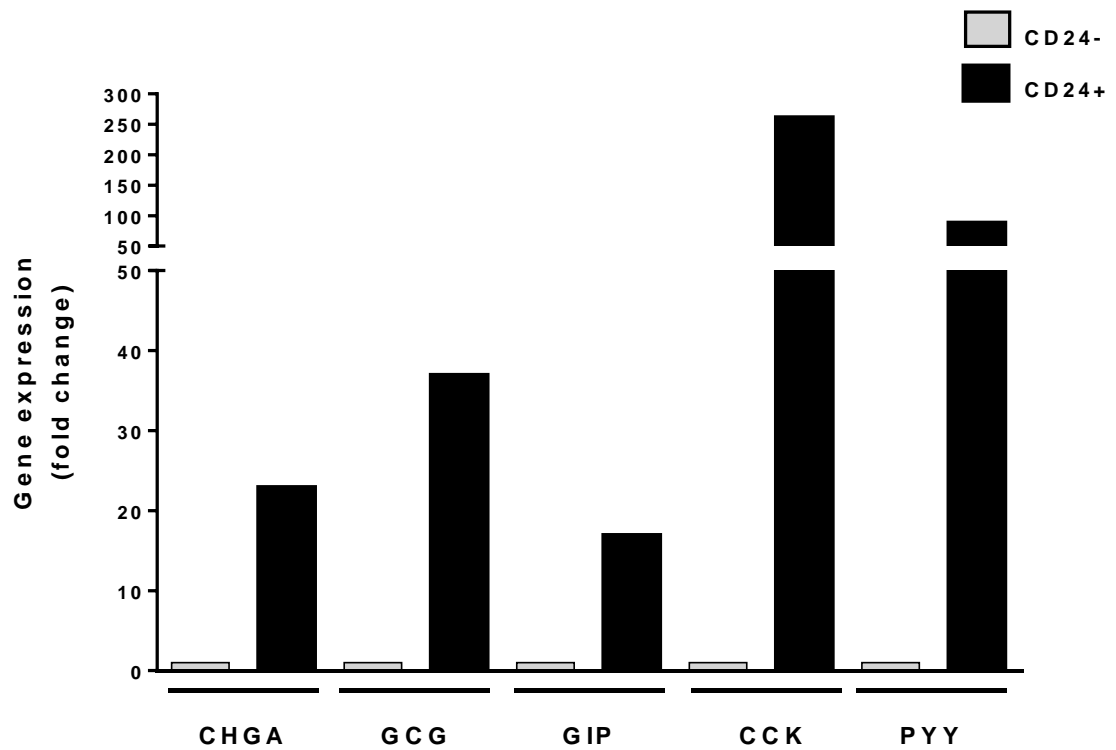

**Supplementary Fig. 2** RNA sequencing analysis of enterohormone gene expression in CD24- (gray bar) and CD24+ (black bar) cells from one ObD subject. Values of gene expression in pseudo-counts are expressed as fold change.

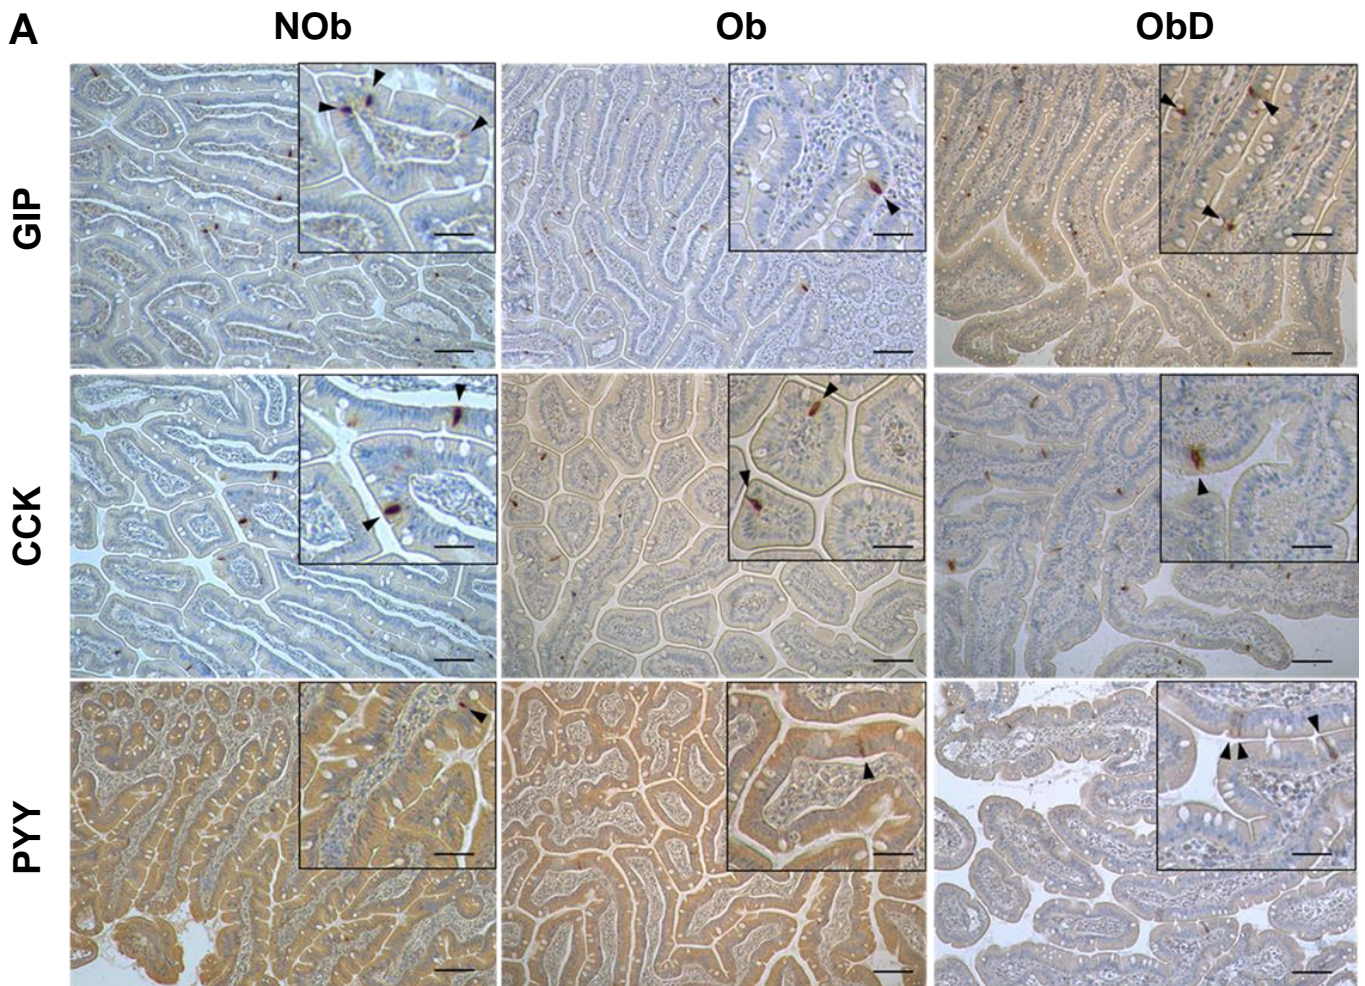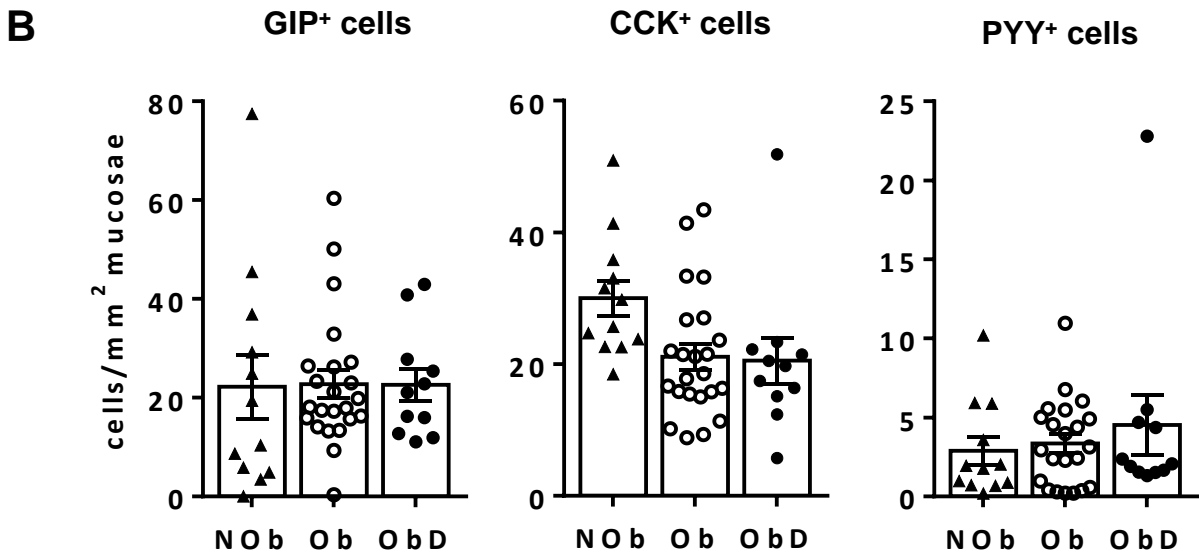

**Supplementary Fig 3:** EEC densities in non-obese (NOb), obese (Ob) and obese-diabetic (ObD) individuals. A) Representative images of GIP, CCK and PYY immunostaining in jejunum sections in which positive cells are colored in brown (scale bar 150  $\mu$ m). A magnification is shown in the box (scale bar 300  $\mu$ m) in which positive cells are indicated with black arrowheads. B) Cell densities are expressed as number of positive cells per mm<sup>2</sup> of the jejunum mucosae in NOb (n=12, black triangle), Ob (n=23, open circle) and ObD (n=11, black circle) individuals.
